1 **Trophic cascade driven by behavioural fine-tuning as naïve prey rapidly**  
2 **adjust to a novel predator**

3

4 CHRIS J. JOLLY\*<sup>1</sup>, ADAM S. SMART<sup>1</sup>, JOHN MOREEN<sup>2</sup>, JONATHAN K. WEBB<sup>3</sup>, GRAEME R.

5 GILLESPIE<sup>1,4</sup> AND BEN L. PHILLIPS<sup>1</sup>

6 <sup>1</sup>School of BioSciences, University of Melbourne, Parkville Vic 3010 Australia

7 <sup>2</sup>Kenbi Rangers, Mandorah NT 0822 Australia

8 <sup>3</sup>School of Life Sciences, University of Technology Sydney, Broadway NSW 2007 Australia

9 <sup>4</sup>Flora and Fauna Division, Department of Environment and Natural Resources, Northern Territory

10 Government, Berrimah NT 0828 Australia

11

12

13 **\*Correspondence:**

14 C. Jolly

15 Email: [cjolly1@student.unimelb.edu.au](mailto:cjolly1@student.unimelb.edu.au)

16

17

18

19

20

21 November 2019

22

23 **Keywords:** Antipredator behaviour, boldness, invasion, neophobia, novel predator,

24 predator-prey dynamics, prey naivety

25 **The arrival of novel predators can trigger trophic cascades driven by shifts in prey**  
26 **numbers. Predators also elicit behavioural change in prey populations, via phenotypic**  
27 **plasticity and/or rapid evolution, and such changes may also contribute to trophic**  
28 **cascades. Here we document rapid demographic and behavioural changes in populations**  
29 **of a prey species (grassland melomys *Melomys burtoni*, a granivorous rodent) following**  
30 **the introduction of a novel marsupial predator (northern quoll *Dasyurus hallucatus*).**  
31 **Within months of quolls appearing, populations of melomys exhibited reduced survival**  
32 **and population declines relative to control populations. Quoll-invaded populations ( $n = 4$ )**  
33 **were also significantly shyer than nearby, quoll-free populations ( $n = 3$ ) of conspecifics.**  
34 **This rapid but generalised response to a novel threat was replaced over the following two**  
35 **years with more threat-specific antipredator behaviours (i.e. predator-scent aversion).**  
36 **Predator-exposed populations, however, remained more neophobic than predator-free**  
37 **populations throughout the study. These behavioural responses manifested rapidly in**  
38 **changed rates of seed predation by melomys across treatments. Quoll-invaded melomys**  
39 **populations exhibited lower per-capita seed take rates, and rapidly developed an**  
40 **avoidance of seeds associated with quoll scent, with discrimination playing out over a**  
41 **spatial scale of tens of metres. Presumably the significant and novel predation pressure**  
42 **induced by quolls drove melomys populations to fine-tune behavioural responses to be**  
43 **more predator-specific through time. These behavioural shifts could reflect individual**  
44 **plasticity (phenotypic flexibility) in behaviour or may be adaptive shifts from natural**  
45 **selection imposed by quoll predation. Our study provides a rare insight into the rapid**  
46 **ecological and behavioural shifts enacted by prey to mitigate the impacts of a novel**  
47 **predator and shows that trophic cascades can be strongly influenced by behavioural as**  
48 **well as numerical responses.**

## 49 INTRODUCTION

50 Predation is one of the most pervasive and powerful forces acting on populations. Not only  
51 does predation directly impact a population's demography (Schoener & Spiller 1996), it also  
52 imposes natural selection (Abrams 2000). The pressure that predators impose on  
53 populations will vary through time and space for many reasons, including tightly coupled  
54 predator-prey dynamics, predator movement, prey switching, or stochastic processes (Lima  
55 & Dill 1990; Sih 1992). The fact that predation is not constant, and that antipredator  
56 defences may be costly, suggests that flexible responses to predation pressure will often be  
57 favoured (Sih *et al.* 2000; Berger *et al.* 2001). There is, in fact, a great deal of empirical  
58 evidence that flexible responses to predation are common (e.g. Relyea 2003; Brown *et al.*  
59 2013; Cunningham *et al.* 2019). Investment in antipredator traits across morphology, life-  
60 history, and behaviour often varies, and is dependent on the perceived risk of predation.

61 As well as impacting prey populations, it is increasingly apparent that predators play  
62 a powerful role in structuring communities (Estes *et al.* 2011). Some of our best evidence for  
63 this comes from the introduction of predators to naïve communities. Invasive predators can  
64 cause extinctions (Medina *et al.* 2011; Woinarski *et al.* 2015; Doherty *et al.* 2016), and alter  
65 trophic structures and ecosystem function within recipient communities (Courchamp *et al.*  
66 2003; Simberloff *et al.* 2013). Cascading outcomes are often thought of as purely numeric  
67 effects: predators depress the size of prey populations, and the altered numbers of prey can  
68 cause cascading numerical changes down trophic levels (Ripple *et al.* 2001). These numerical  
69 effects are undeniably important, but the fact that predators can also elicit phenotypic  
70 change in prey populations—through phenotypic plasticity and natural selection—means  
71 that subtler ecological effects may also manifest. Prey species living alongside predators  
72 may forage at different times, or in different places compared with the same species in a

73 predator-free environment (Laundre *et al.* 2010). Such behavioural shifts can alter  
74 downstream species interactions in potentially complex ways (Fortin *et al.* 2005; Suraci *et al.*  
75 2016).

76 Because predator invasions are rarely intentional or anticipated, there is a scarcity of  
77 controlled empirical work on the effects of novel predators on recipient communities and  
78 the mechanisms via which these effects play out (but see Lapiedra *et al.* 2018; Pringle *et al.*  
79 2019). Such tests are needed, however, if we are to predict invasive species impacts, and  
80 improve conservation management (Sih *et al.* 2010a) and our understanding of how  
81 communities are structured via predator invasion (Sax *et al.* 2007).

82 Northern quolls (*Dasyurus hallucatus*) were, until recently, a common predator  
83 across northern Australia. They have declined over the last several decades, following the  
84 general decline in northern Australian mammals (Woinarski *et al.* 2015), thought to be  
85 driven by changes in grazing, fire, and predation regimes (Braithwaite & Griffiths 1994).  
86 More recently, the invasion of toxic invasive prey (cane toads, *Rhinella marina*) has resulted  
87 in dramatic, range-wide population declines in northern quolls (Shine 2010; Oakwood *et al.*  
88 2016). Due to local extinction, northern quolls are now absent from large tracts of their  
89 former range and their ecological function as a medium-sized mammalian predator has  
90 been lost (Moore *et al.* 2019). For their conservation, northern quolls have recently been  
91 introduced to a number of offshore islands where they have never previously existed.

92 In 2017, a population of 54 northern quolls were introduced to a 25km<sup>2</sup> island off the  
93 coast of north-western Northern Territory, Australia (Kelly 2019). Prior to this introduction,  
94 Indian Island (Kabal) lacked mammalian predators, and large native reptilian predators had  
95 recently been reduced to near extinction by the invasion of cane toads. We take advantage  
96 of the introduction of northern quolls to a new island to directly test the effects of quolls as

97 a novel predator on an island ecosystem and observe how native prey populations adjust to  
98 mitigate the impacts of their arrival. Since quolls are an ecologically novel predator on this  
99 island, we predict that this introduction may result in demographic effects (reduced survival  
100 and abundance) in invaded prey populations. If behavioural adjustments are able to reduce  
101 the demographic effects of a novel predator, we predict rapid behavioural changes in quoll-  
102 exposed melomys populations, such as reduced boldness and foraging rates, and avoidance  
103 of predator-scent, may manifest through time.

104

## 105 **METHODS**

### 106 *Introduction of northern quolls*

107 In May 2017, 54 adult northern quolls were introduced to the north-eastern tip of Indian  
108 Island, Bynoe Harbor, Northern Territory, Australia (12°37'24.60"S, 130°30'0.72"E) to field  
109 test the conservation strategy of targeted gene flow (Kelly & Phillips 2016). Quolls are a  
110 voracious, opportunistic generalist predator (< 1.5k g; Oakwood 1997), and their  
111 introduction presented an opportunity to monitor the behavioural and demographic  
112 impacts on grassland melomys (*Melomys burtoni*), a native mammalian granivorous prey  
113 species (mean body mass 56 g, 5.6–103.7 g). Immediately prior to the introduction of quolls,  
114 we started monitoring populations of melomys in one woodland and two monsoon vine  
115 thicket plots in the vicinity of where quolls were to be released and radio tracked. After  
116 quolls were introduced and tracked it became immediately apparent that quolls were  
117 largely avoiding monsoon vine thicket sites and, since these sites would neither be effective  
118 “impact” or “control” sites, these sites were dropped from the on-going monitoring.  
119 Because these sites had to be dropped from our monitoring, we missed the opportunity to  
120 implement a robust Before-After Impact-Control design. For this reason, we only present

121 data from before the introduction of quolls from one invaded site. Most of our data  
122 compare quoll-invaded (impact) versus quoll-free (control) sites over time, commencing  
123 within a few months of quoll arrival.

124

#### 125 *Melomys population monitoring*

126 To determine whether the arrival of a novel predator resulted in demographic impacts  
127 (population size and survival) to native prey species, we monitored four “impact”, quoll-  
128 invaded sites established in the north of Indian island in the vicinity of where quolls were  
129 released and three “control”, quoll-free site established in the south of the island (Fig 1).  
130 Populations of melomys on Indian Island were monitored during four trips occurring  
131 immediately prior to the introduction of quolls in May (site 1) 2017, and after the  
132 introduction of quolls August 2017 (sites 2–7), April 2018 (sites 1–7), and May 2019 (sites 1–  
133 7).

134 Melomys were monitored at seven independent 1ha (100 m x 100 m) plots (sites 1–  
135 7) spread out across Indian Island using a standard mark-recapture trapping regime  
136 designed for a monitoring project (Begg *et al.* 1983; Kemper *et al.* 1987). Sites in the north  
137 (quoll-invaded) and south (quoll-free) of the island were between 8.7 and 9.8km apart (Fig.  
138 1; Table 1) and were composed of similar habitat types. The northern and southern sections  
139 of Indian Island are divided by mangrove habitat which is inundated at high tide. Cage and  
140 camera trapping as well as track surveys confirmed that quolls were present at the “impact”  
141 sites and absent from the “control” sites for the duration of the study (Jolly *et al.* unpub.  
142 data).

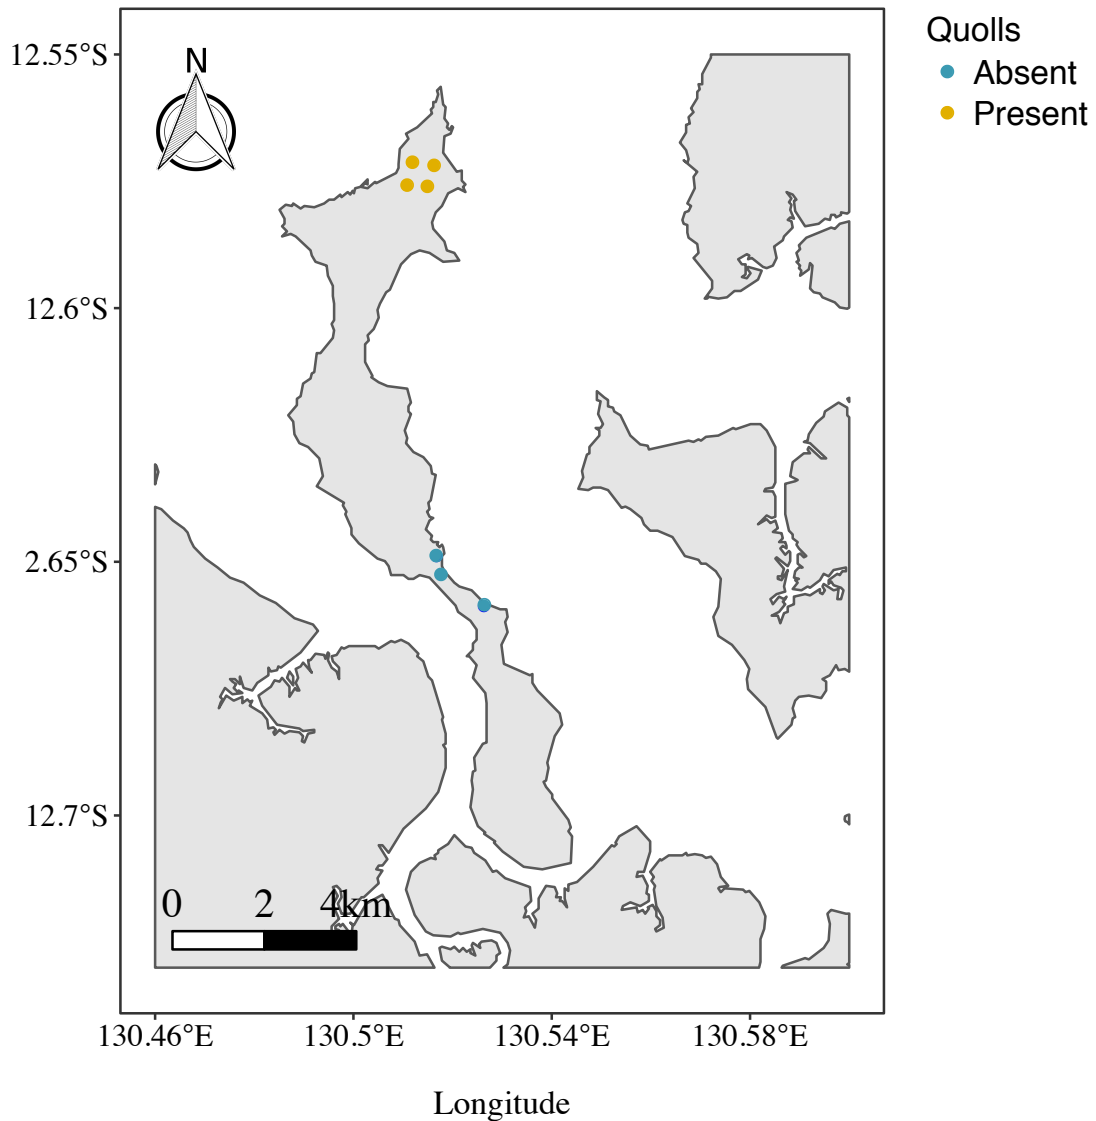

143

144 **Figure 1.** Map showing the arrangement of grassland melomys (*Melomys burtoni*) monitoring sites on Indian

145 Island, Northern Territory, Australia. Quolls were present at the four monitoring sites in the north of the island

146 and quolls were absent from the three monitoring sites in the south of the island for the duration of the study.

147

148

149

150

151

152

153

154 **Table 1.** Pairwise distance matrix between sites on Indian Island, Northern Territory, Australia. Quolls were  
155 present at sites 1–4 and quolls were absent at sites 5–7 for the duration of the study.

| Distance (m) | Site 1 | Site 2 | Site 3 | Site 4 | Site 5 | Site 6 | Site 7 |
|--------------|--------|--------|--------|--------|--------|--------|--------|
| Site 1       |        |        |        |        |        |        |        |
| Site 2       | 270    |        |        |        |        |        |        |
| Site 3       | 260    | 350    |        |        |        |        |        |
| Site 4       | 400    | 300    | 250    |        |        |        |        |
| Site 5       | 8760   | 9030   | 8710   | 9000   |        |        |        |
| Site 6       | 8470   | 8730   | 8450   | 8070   | 300    |        |        |
| Site 7       | 9670   | 9920   | 9590   | 9820   | 1260   | 1500   |        |

156

157 Each of the seven monitoring sites consisted of 100 Elliott traps (Elliott Scientific  
158 Equipment, Upwey, Victoria) spaced at 10 m intervals in a 10 x 10 grid. Most trapping grids  
159 were open for four nights, however, the first trapping grid (site 1, May 2017) was open for  
160 six nights. After four trap nights, the majority of the melomys population had been captured  
161 at least once (Jolly *et al.* 2019). Traps were baited with balls of peanut butter, rolled oats  
162 and honey. These baits were replaced daily for the duration of each trapping session. Traps  
163 were checked for captures early each morning and all traps were cleared within two hours  
164 of sunrise.

165 Captured melomys were weighed (g) and sexed. Before release, each melomys was  
166 implanted with a microchip (Trovan Unique ID100). On successive mornings, all melomys  
167 were scanned (Trovan LID575 Handheld Reader), and any new individuals were  
168 microchipped. On the last morning of each trapping session, all melomys caught were  
169 retained for behavioural assays. Throughout the study 439 individual melomys were  
170 captured and given microchips (melomys caught per site: site 1 = 83; site 2 = 52; site 3 = 63;  
171 site 4 = 59; site 5 = 69; site 6 = 59; and site 7 = 54). Of these, 146 (33%) were caught on the  
172 final night of trapping and were retained for behavioural trials. Only large, healthy juveniles  
173 ( $n = 11$ ), adult males ( $n = 58$ ), and adult non-visibly pregnant females ( $n = 77$ ) were retained



174 for behavioural experiments. Melomys were retained in their respective Elliott traps and  
175 taken to the field station for diurnal husbandry. They were provided food and water *ad*  
176 *libitum* until 2 hours prior to testing. At this point, in an attempt to standardise hunger  
177 levels, access to food and water was removed. Indian Island is remote and uninhabited by  
178 humans, so all behavioural experiments were conducted in the field under near natural  
179 conditions (see Jolly *et al.* 2019 for detailed experimental procedures).

180

### 181 *Modified open field tests*

182 We employed modified open field tests (also referred to as emergence tests: see Brown &  
183 Braithwaite 2004; López *et al.* 2005; Carter *et al.* 2013; Jolly *et al.* 2019) to assess boldness  
184 in grassland melomys and whether the arrival of a novel predator resulted in behavioural  
185 shifts in invaded populations. All open field tests were conducted on the night after the last  
186 trap night (night 5) and in opaque-walled experimental arenas (540mm x 340mm x 370mm).  
187 Experimental arenas were modified plastic boxes that had an inverted Elliott trap sized hole  
188 cut in one end and were illuminated by strings of red LED lights (Jolly *et al.* 2019). Each  
189 experimental arena had natural sand as substrate, and a rolled ball of universal bait (peanut  
190 butter, oats and honey) located both in the centre and along one wall of the arena (Jolly *et*  
191 *al.* 2019). After dark, Elliott traps containing a melomys were inserted into the hole in the  
192 side of each experimental arena and melomys were allowed to habituate for 10 min. At the  
193 start of each trial, Elliott trap doors were locked open—the inverted orientation of the trap  
194 prevented them from being triggered closed. Melomys were given 10 min to explore the  
195 open field arena. After 10 min, individuals were rounded back into their retreat (the Elliott  
196 trap) and a novel object (standard red, plastic disposable bowl) was placed at the end of the  
197 arena opposite the Elliott trap (Jolly *et al.* 2019). Melomys were then given a further 10 min

198 to explore the arena and interact with the novel object. Elliott traps remained open during  
199 the open field tests and melomys could shelter and emerge from them under their own  
200 volition. All trials were recorded using a GoPro HERO 3. A previous study in this system  
201 determined that melomys showed repeatable behaviour between trials (boldness:  $R$  [ $\pm$   
202 95%CI] = 0.67 [0.47, 0.80],  $P < 0.001$ ; emergence time:  $R$  [ $\pm$  95%CI] = 0.73 [0.53, 0.83],  $P <$   
203 0.001; novel object:  $R$  [ $\pm$  95%CI] = 0.61 [0.209, 0.974],  $P < 0.001$ ; Jolly *et al.* 2019), therefore  
204 the data presented in this study were from a single behavioural trial of each animal ( $n =$   
205 146). Once trials were complete, each melomys was released at its point of capture.

206 To measure the boldness of individual melomys, we scored three behaviours  
207 typically associated with boldness and neophobia in rodents (Dielenberg & McGregor 2001;  
208 McGregor *et al.* 2002; Réale *et al.* 2007; Cremona *et al.* 2015): whether melomys fully  
209 emerged from their Elliott trap hide and entered the open arena during the 0–10 min period  
210 (scored 0 or 1, respectively); whether they fully emerged and entered the trial arena during  
211 the 10–20 min period (scored 0 or 1); and whether they interacted (touched) with the novel  
212 object that was placed in the arena during the 10–20 min period (scored 0 or 1). Videos  
213 were scored by a single observer who was blind to each melomys' origin and identity.  
214 Because interacting with the novel object was predicated on a melomys' willingness to  
215 emerge from their hide during the 10–20 min period, for analysis we combined their  
216 emergence during this period and interaction with the novel object into a single binary  
217 score: 0 (neophobic) = did not emerge or emerged but did not interact with novel object; or  
218 1 (not neophobic): emerged and interacted with novel object.

219

220

221

222 *Seed removal plots*

223 To assess whether the arrival of a novel predator affected the seed harvesting behaviour of  
224 granivorous melomys, we established seed removal plots at each site and sampled them  
225 each trapping session (night 6). After trapping and open field tests were conducted and  
226 melomys had been returned to their capture location, we set up 81 seed plots at each site  
227 by scraping away leaf litter with a shovel to create bare earth plots. These bare earth plots  
228 were created so that they were located in the centre between four Elliott traps within the  
229 10x10 trapping grid. All seed plots were located randomly with respect to “distances to  
230 cover” but were all located on relatively open patches of ground. Sufficient within site  
231 replication ( $n = 81$ ) significantly reduces the likelihood of distance to cover biasing  
232 population-level responses to seeds. Just before dark on the night of the seed removal  
233 experiment, we placed a single wheat seed in the centre of each bare earth plot. These  
234 seeds were either unscented, control seeds ( $n = 40$ ) or predator-scented seeds that had  
235 been maintained in a sealed clip-lock bag filled with freshly collected northern quoll fur ( $n =$   
236 41). The placement of predator-scented and unscented seeds was alternated so that there  
237 was a chequered arrangement of scented and unscented seeds across the site. To ensure  
238 that the predator-scent was strong enough to be detected by melomys, along with the  
239 predator-scented seeds, we also placed a few strands of quoll fur around the predator-  
240 scented seeds. Before light the next morning, we returned back to each plot and counted  
241 the number of seeds of each scent-type that were removed from the plot. Melomys are the  
242 only nocturnal granivorous animal that occurs on Indian Island, and to avoid diurnal  
243 granivorous birds from removing seeds we conducted this experiment during the night only.

244

245

246 *Wildfire on northern Indian Island*

247 Immediately following our monitoring and experiments in August 2017, a wildfire broke out  
248 on northern Indian Island in the vicinity of the four quoll-invaded sites and burnt through all  
249 of the sites. Because of this, our experimental design is confounded by the fact that all of  
250 our quoll-invaded sites were burnt, and all of our quoll-free sites were unburnt. Fire is a  
251 regular disturbance in this landscape (Andersen *et al.* 2005), and previous work has shown  
252 little effect of fire on abundance, survival or recruitment of grassland melomys (Griffiths &  
253 Brook 2015; Liedloff *et al.* 2018). Nonetheless, this confound exists and we proceed with  
254 caution when interpreting the effects of quolls on population size and survival of melomys.

255

256 *Statistical analysis*

257 During trapping sessions we identified individual melomys that were captured at each site  
258 by their unique microchips. Because melomys on Indian Island have very small home ranges  
259 (tending to be caught in the same or adjacent traps throughout the trapping period: Jolly *et*  
260 *al.* unpub. data) and since we never observed captures of melomys marked at other sites  
261 (Jolly *et al.* unpub. data), we treated each site as independent with regard to demographics  
262 and behaviour (Table 1).

263 To estimate between-session survival, we analysed the mark-recapture data to  
264 estimate recapture and survival rates using Cormack-Jolly-Seber models in program MARK.  
265 At each site, there were three primary trapping sessions of four nights, for a total of 12 time  
266 intervals in the input file. Because quolls prey on melomys, we hypothesised that survival  
267 rates of melomys would be lower between trapping sessions at sites with quolls than at  
268 sites without quolls. We included two groups, quoll-free (control) and quoll-invaded  
269 (impact), in the input file. We ran a series of models in MARK to test the following *a priori*

270 hypotheses: (1) survival rates between sessions are lower at quoll-free sites than at quoll-  
271 invaded sites; (2) survival rates are lower between sessions than within sessions, but are  
272 unaffected by quolls; (3) survival is constant through time; and (4) survival varies through  
273 time. All candidate models were ranked according to their AICc values and associated AIC  
274 weights (Burnham & Anderson 1998). Models with AICc values  $< 2$  were considered to be  
275 well supported by the data (Burnham & Anderson 1998). We used Akaike's Weights, which  
276 are proportional to the normalized, relative likelihood of each model, and to determine  
277 which of these models was most plausible (Buckland *et al.* 1997).

278 To test whether the presence of quolls impacted melomys population size, we used  
279 a hierarchical model in which population size was made a function of quoll  
280 presence/absence, capture session, and the interaction between these factors. Population  
281 size at each site during each session is estimated in this process, and we fitted this model in  
282 a Bayesian framework. Our observations consisted of a capture history for each observed  
283 individual over the number of nights at each site for each trapping session. We denoted the  
284 number of individuals at site  $s$  during session  $k$  as  $N_{ks}$ . To estimate  $N_{ks}$  we used a closed  
285 population mark-recapture analysis in which each individual,  $i$ , was either observed, or not  
286 ( $O_{iks}$ ), according to a Bernoulli distribution:

$$287 \quad O_{iks} \sim \text{Bernoulli}(d_s)$$

288 Where  $d_s$  denotes the expected detection probability within session  $s$ . Our previous MARK  
289 analysis found clear evidence for variation in detection probability across sessions, but  
290 detection probabilities of melomys on Indian Island had previously been found not to vary  
291 measurably between individuals nor to change over time within a trapping session (Jolly *et*  
292 *al.* 2019). Thus, we made detection probability a function of session according to:

$$293 \quad \text{logit}(d_s) = \mu_d + t_s$$

294 Where  $\mu_d$  is the expected detection probability in the first session, and  $t_s$  denotes the  
295 (categorical) effect of session on detection.

296 We used the “data augmentation” method (Tanner & Wong 1987; Royle *et al.* 2007;  
297 Kery & Schaub 2011) in combination with this detection probability to estimate  $N_{ks}$  for each  
298 site per session (site.session). Using this approach, the data were ‘padded’ to a given size by  
299 adding an arbitrary number of zero-only encounter histories of ‘potential’ unobserved  
300 individuals. The augmented dataset was then modelled as a zero-inflated model (Royle *et al.*  
301 2007) which changes the problem from estimating a count, to estimating a proportion. This  
302 was executed by adding a latent binary indicator variable,  $R_{iks}$ , (taking values of either 0 or 1)  
303 to classify each row in the augmented data matrix as a ‘real’ individual or not, where  $R_{iks} \sim$   
304 Bernoulli( $\Omega_{ks}$ ). The parameter  $\Omega_{ks}$  is the proportion of the padded population that is real,  
305 and  $N_{ks} = \sum_i R_{iks}$ .

306 We then made  $\Omega_{ks}$  (which scales with population size) a function of quoll  
307 presence/absence,  $q_c$ ; session,  $b_k$ ; and the interaction between the two:

$$308 \quad \text{logit}(\Omega_{ks}) = \mu_p + q_c + b_k + \gamma_{ck}$$

309 The model was fitted using Bayesian Markov Chain Monte Carlo (MCMC) methods  
310 and minimally informative priors (Table 2) within the package JAGS (Plummer *et al.* 2017)  
311 using R (R Core Team 2019). Parameter estimates were based on 30,000 iterations with a  
312 thinning interval of 5 following a 10,000 sample burn-in. Three MCMC chains were run, and  
313 model convergence assessed by eye, and using the Gelman-Rubin diagnostic (Gelman &  
314 Rubin 1992a, 1992b).

315 To assess whether the introduction of quolls affected the behaviour of melomys  
316 populations, we divided the responses of melomys in open field tests into two independent  
317 response variables: whether individuals emerged or not during the 0-10 min period

318 (binomial: 0 or 1); and whether individuals emerged and interacted with the novel object or  
319 not during the 10-20 min period (binomial: 0 or 1). We used generalised linear mixed-effects  
320 models with binomial errors and a logit link to test the effect of quoll presence (two levels:  
321 quolls present and quolls absent) and trapping session (continuous), with site included as a  
322 random effect, on the behavioural response variables. *P*-values were obtained by likelihood  
323 ratio tests of the full model with the effect in question against the model without the effect.  
324 This analysis was performed using R with the *lme4* software package (R Core Team 2019).

325 To assess whether the numerical impact of quolls on melomys affected the seed  
326 harvesting rate of invaded melomys populations, we first examined the relationship  
327 between melomys population size (estimated above) and the total number of control  
328 (unscented) seeds harvested from each site. Here we used a simple linear model with  
329 number of seeds harvested a linear function of population size, quoll presence/absence and  
330 the interaction between these effects. To test whether there was an additional effect of  
331 quoll presence, beyond their effect on population size, we defined a new variable,  $\Delta_{ks}$ , as  
332 the difference in seed take between scented and unscented treatments within each  
333 site.session. Here any effect of melomys density is cancelled out (because density is  
334 common to both treatments within each site.session). Thus, we fitted a model in which  $\Delta_{ks}$   
335 is a function of quoll presence/absence, session and the interaction between these effects.  
336 These analyses were performed using R (R Core Team 2019).

337

## 338 **RESULTS**

### 339 *Effect of novel predator on survival*

340 When we assessed the impact of quolls on melomys survival between trapping sessions the  
341 best supported model was one in which survival rates between sessions were lower at

342 quoll-invaded sites than at quoll-free sites, and recapture rates were session-dependent  
343 (Table 2). All other models were more than 4 AIC units from this best model, and so clearly  
344 inferior descriptions of the data. From the best-supported model, estimates of apparent  
345 survival ( $S$ ) for the intervals between the capture sessions were substantially higher at  
346 quoll-free sites ( $S_{2017-2018} = 0.368$ ;  $S_{2018-2019} = 0.225$ ) than at quoll-invaded sites ( $S_{2017-2018} =$   
347  $0.207$ ;  $S_{2018-2019} = 0.091$ ; Fig. 2). The differing survival probability between sessions is  
348 largely explained by the time difference between intervals (2017–2018 = 9 months vs.  
349 2018–2019 = 13 months; Fig. 3).

350

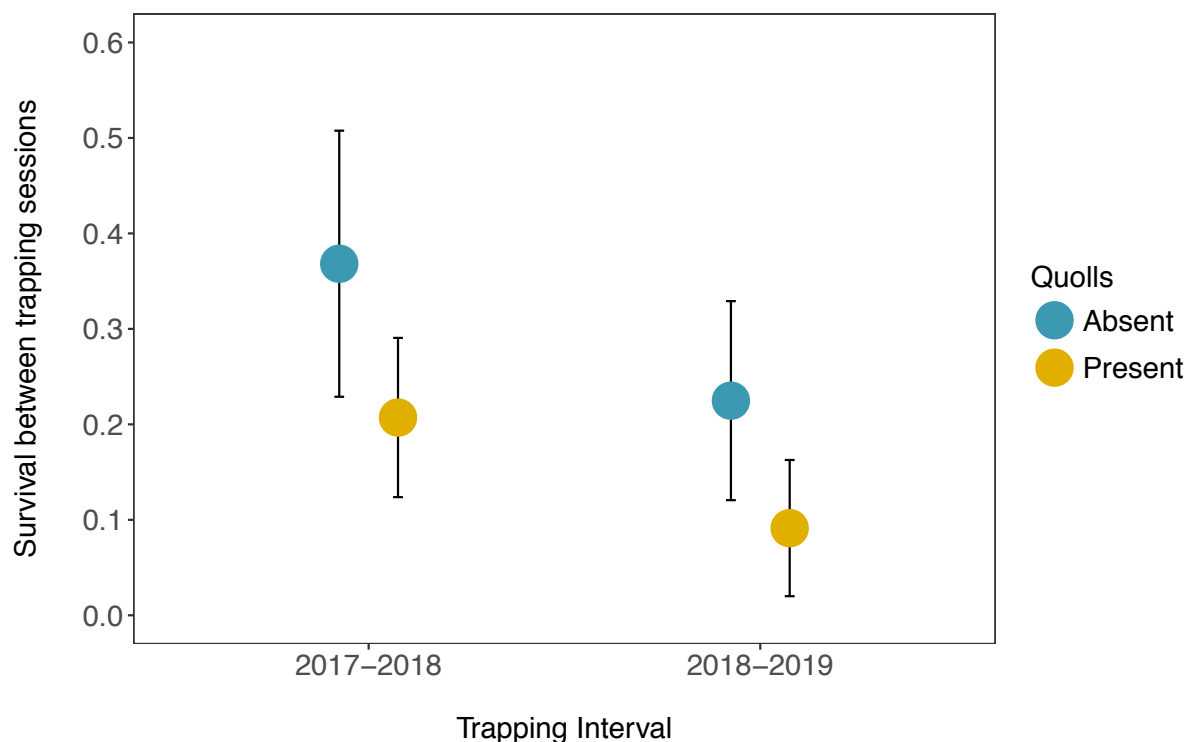

351

352 **Figure 2.** Between trapping session survival ( $\pm$  95% CI) of grassland melomys (*Melomys burtoni*) on Indian  
353 Island in quoll-invaded ( $n = 4$ ) and quoll-free ( $n = 3$ ) populations on Indian Island, Northern Territory, Australia.

354

355

356



357 **Table 2.** Results of Cormack-Jolly-Seber analyses used to compare survival ( $\Phi$ ) and recapture ( $p$ ) probabilities  
 358 of grassland melomys (*Melomys burtoni*) on Indian Island, Northern Territory, Australia. The symbols ‘.’ and ‘t’  
 359 refer to constant and time, respectively, while ‘g’ denotes the two groups (quoll free versus quolls present).  
 360 Table shows AIC values and associated AIC weights, model likelihood, number of parameters ( $N$ ), and model  
 361 deviance. The term ‘w/b’ indicates that within trapping session survival rates ( $s_1$ - $s_3$ ,  $s_5$ - $s_7$ ,  $s_9$ - $s_{11}$ ) were constant  
 362 and equivalent, and different to the between trapping session survival rates ( $s_4$ ,  $s_8$ ). The term ‘group w/b’ is as  
 363 above, except that between trapping session survival rates differed between the two groups.

| Model                    | AICc     | Delta AICc | AICc Weights | Model Likelihood | N  | Deviance |
|--------------------------|----------|------------|--------------|------------------|----|----------|
| Phi (group w/b) p(t)     | 1688.629 | 0          | 0.92162      | 1                | 16 | 477.5224 |
| Phi (w/b) p(t)           | 1693.562 | 4.933      | 0.07823      | 0.0849           | 14 | 486.6202 |
| Phi (group w/b) p(g x t) | 1701.116 | 12.4873    | 0.00179      | 0.0019           | 27 | 466.705  |
| Phi (group w/b) p(g x t) | 1703.132 | 14.503     | 0.00065      | 0.0007           | 7  | 510.5963 |
| Phi (t) p (g*t)          | 1718.863 | 30.2344    | 0            | 0                | 32 | 473.631  |
| Phi (t) p (.)            | 1719.862 | 31.2339    | 0            | 0                | 12 | 517.0641 |
| Phi (t) p (g)            | 1720.751 | 32.1229    | 0            | 0                | 13 | 515.8843 |

364

### 365 *Effect of novel predator on population size*

366 Populations of melomys declined dramatically in quoll-invaded sites in the year following  
 367 their introduction but not in quoll-free sites (Fig. 3). We observe a strong negative  
 368 interaction between the presence of quolls and trapping session in 2018 (mean = -1.194,  
 369 95% credible interval [-1.732, -0.665]) and 2019 (mean = -1.097, 95% confidence interval [-  
 370 1.652, -0.551]; Fig. 3; Table 3).

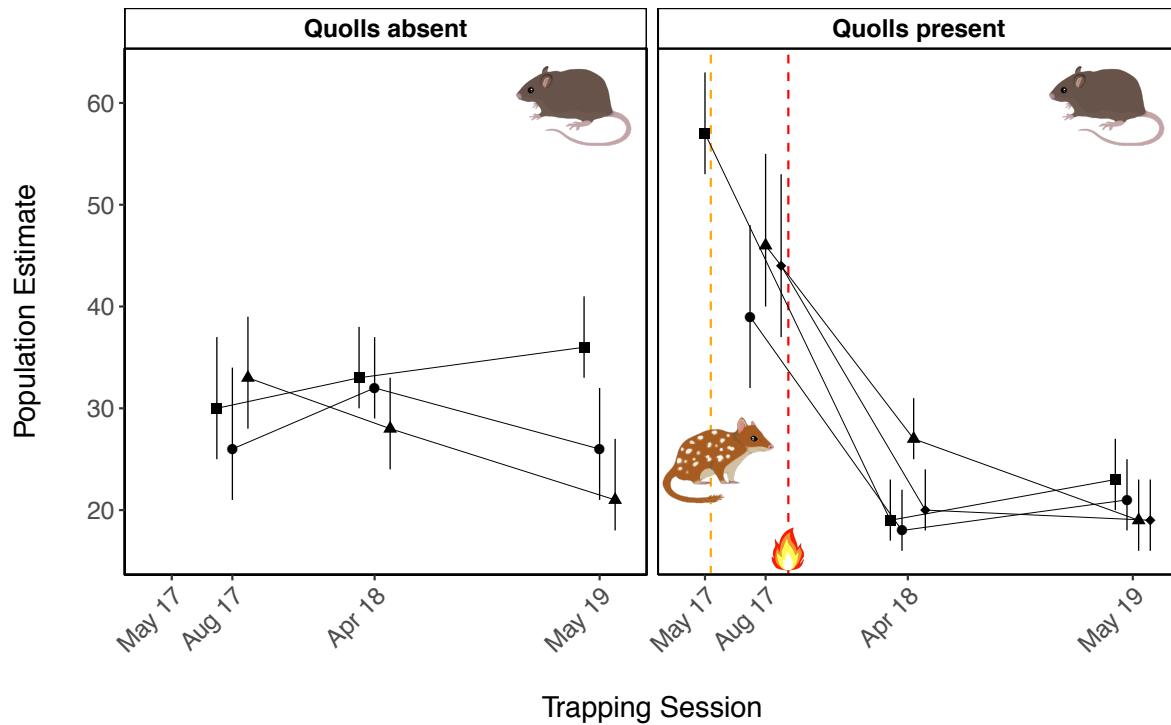

371

372 **Figure 3.** Posterior mean population sizes ( $N_{ks} \pm 95\%$  CI) for quoll-invaded and quoll-free populations of  
373 grassland melomys (*Melomys burtoni*) on Indian Island, Northern Territory, Australia. The orange dotted  
374 vertical line denotes the timing of the introduction of quolls. The red dotted vertical line denotes the timing of  
375 an unplanned fire that burnt through the quoll-invaded sites. In each predator treatment, different sites are  
376 denoted by different shaped points. Estimates assume closure of the population within each session and  
377 detection probability that varies across sessions.

378

379

380

381

382

383

384

385

386 **Table 3.** Model parameters and their priors including prior distributions, standard deviation, estimated  
 387 posterior means and their 95% credible intervals. N denotes normal probability distribution with mean and  
 388 standard deviation.

| Model Parameters                                    |                |                  |                |                        |
|-----------------------------------------------------|----------------|------------------|----------------|------------------------|
| Name for parameter                                  | Parameter      | Prior (mean, SD) | Posterior mean | 95% credible intervals |
| <b>Detection:</b>                                   |                |                  |                |                        |
| Intercept for detection                             | $\mu_d$        | N (0, 2.71)      | -0.94          | -1.12, -0.76           |
| Effect of session 2 on detection                    | $t_2$          | N (0, 2.71)      | 0.59           | 0.33, 0.85             |
| Effect of session 3 on detection                    | $t_3$          | N (0, 2.71)      | 0.46           | 0.18, 0.73             |
| <b>Population size:</b>                             |                |                  |                |                        |
| Intercept for Omega                                 | $\mu_p$        | N (0, 2.71)      | -0.91          | -1.22, -0.58           |
| Quoll Presence                                      | $r_2$          | N (0, 2.71)      | 0.70           | 0.31, 1.09             |
| Trapping Session 2                                  | $b_2$          | N (0, 2.71)      | 0.06           | -0.36, 0.48            |
| Trapping Session 3                                  | $b_3$          | N (0, 2.71)      | -0.10          | -0.53, 0.34            |
| Interaction 1 [Quoll Presence * Trapping Session 2] | $\gamma_{2,2}$ | N (0, 2.71)      | -1.19          | -1.73, -0.67           |
| Interaction 2 [Quoll Presence * Trapping Session 3] | $\gamma_{2,3}$ | N (0, 2.71)      | -1.10          | -1.65, -0.55           |

389

390 *Effects of novel predator on prey behaviour*

391 For the proportion of melomys emerging in open field tests during the 0–10 min period,  
 392 there was a significant interaction between quoll presence and trapping session ( $\chi^2$  (5) =  
 393 4.386,  $P = 0.04$ ; Fig. 4). There was no interaction between quoll presence and trapping  
 394 session for the proportion of melomys emerging and interacting with the novel object  
 395 during 10–20 min period ( $\chi^2$  (5) = 2.567,  $P = 0.109$ ; Fig. 4). The model without this

396 interaction, however, revealed a significant effect of quoll presence, with fewer melomys  
397 emerging from hiding and interacting with the novel object during the 10–20 min period of  
398 open field tests from sites where quolls were present than from sites where quolls were  
399 absent ( $\chi^2(5) = -4.696, P < 0.001$ ; Fig. 4).  
400

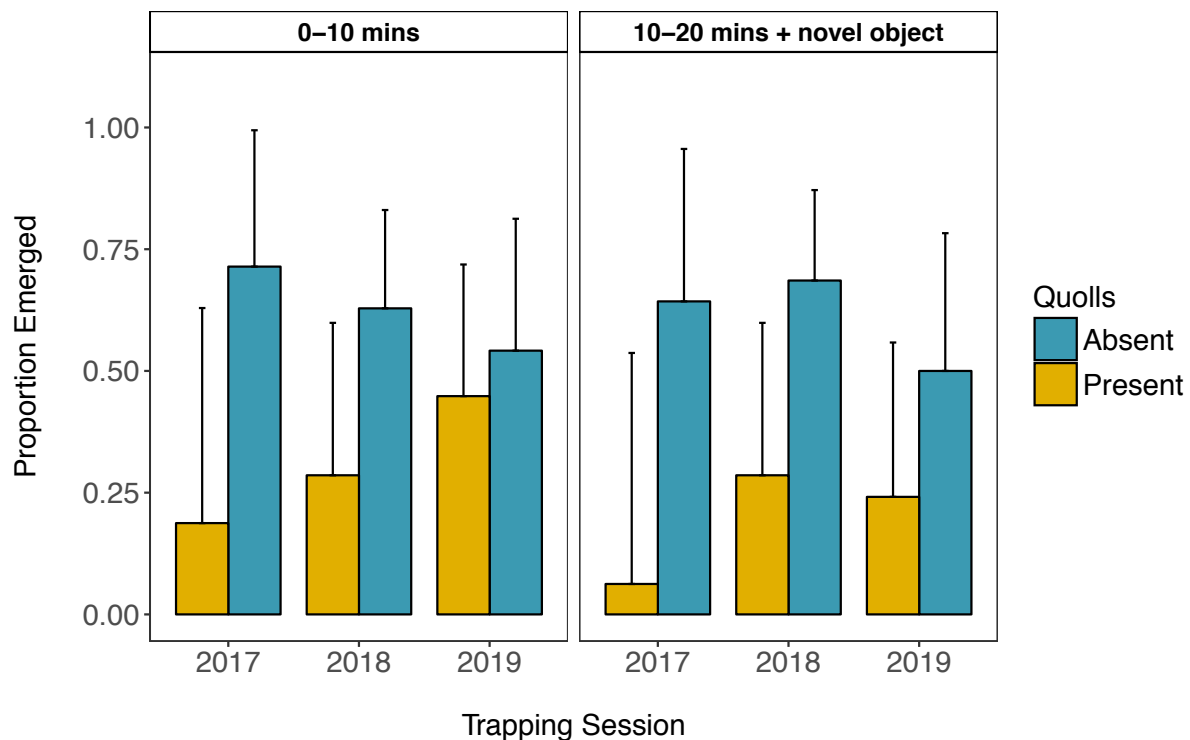

401  
402 **Figure 4.** Mean proportion ( $\pm$  95% CI) of grassland melomys (*Melomys burtoni*) emerging from hiding during  
403 open field tests from quoll-invaded sites in 2017 ( $n = 16$ ), 2018 ( $n = 28$ ) and 2019 ( $n = 29$ ), and quoll-free sites  
404 in 2017 ( $n = 14$ ), 2018 ( $n = 35$ ) and 2019 ( $n = 24$ ) on Indian Island, Northern Territory, Australia.

405  
406 *Effects of novel predator on seed harvesting and predator-scent aversion*

407 Although there was no interaction between melomys density and quoll presence ( $t_{18} = -$   
408 0.251,  $P = 0.805$ ; Fig. 5), there was a very clear positive relationship between melomys  
409 density and seed take ( $t_{18} = 5.112, P < 0.001$ ; Fig. 5) and a clear negative relationship  
410 between quoll presence and seed take ( $t_{18} = -2.344, P = 0.031$ ; Fig. 5).

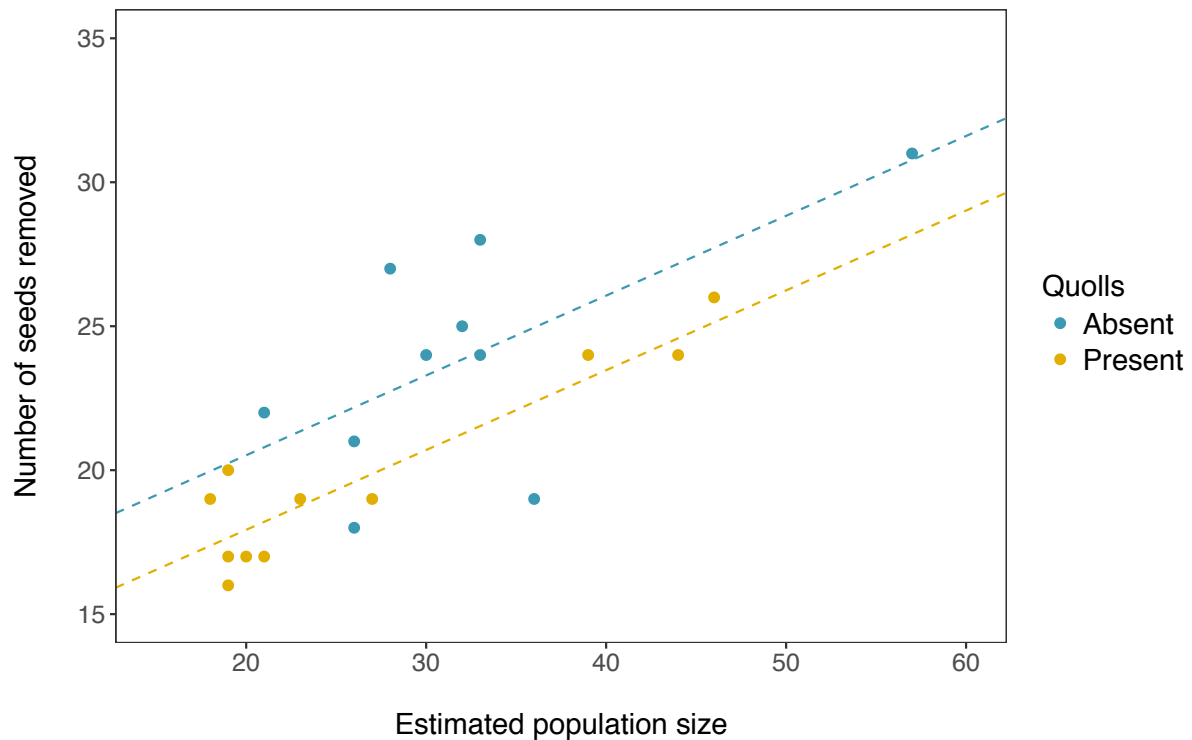

411

412

**Figure 5.** Effect of estimated population size on the number of control, unscented seeds removed from seed plots ( $n = 21$ ) in quoll-invaded and quolls-free sites. Dotted lines denote the effect of quoll presence on seed removal rate.

415

416

When we looked at the difference in seed take ( $\Delta_{ks}$ ) between scent treatments

417

within site.session, a striking pattern emerges, in which there is a clear interaction between

418

the presence of quolls and session ( $F_{3,17} = 18.61, P < 0.001$ ; Fig. 6).

419

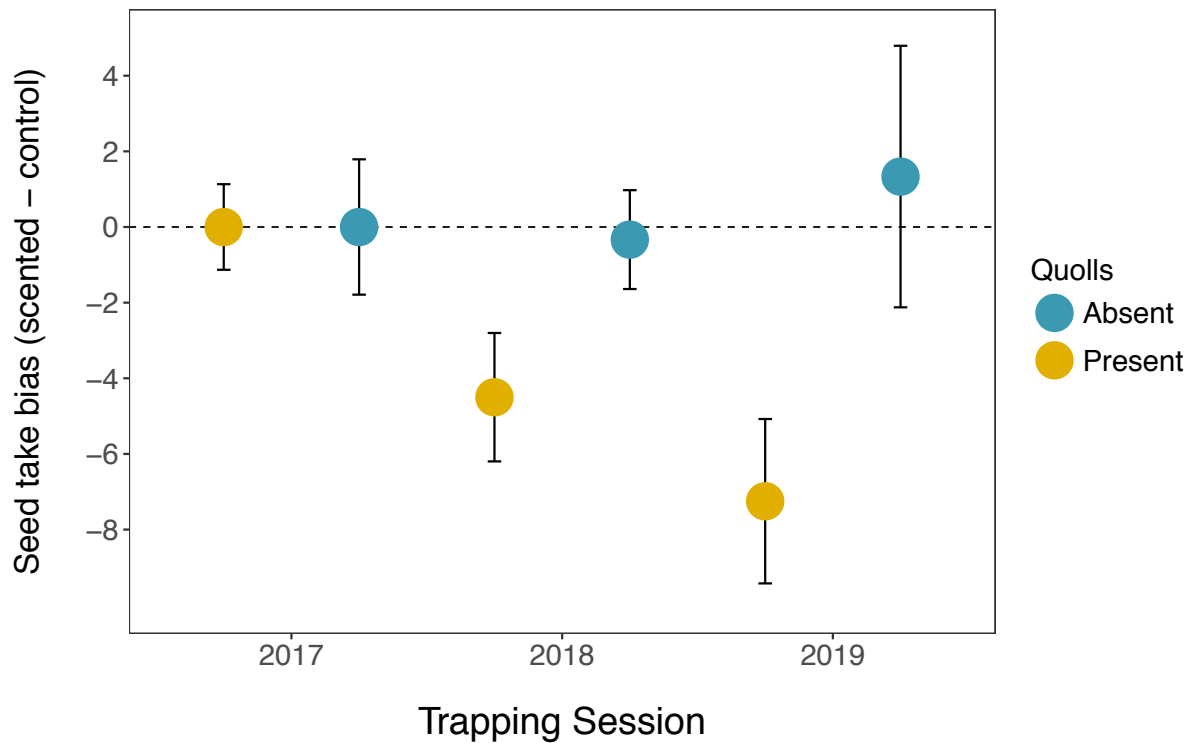

420

421 **Figure 6.** Mean ( $\pm$  95% CI) difference ( $\Delta$ ) between the number of predator-scented seeds and control,  
422 unscented seeds removed by melomys from quoll-invaded ( $n = 3$ ; 2017 &  $n = 4$ ; 2018-19) and quoll-free ( $n = 4$ ;  
423 2017 &  $n = 3$ ; 2018-19) sites during each trapping session.

424

## 425 **DISCUSSION**

426 The introduction of northern quolls to Indian Island was associated with lowered survival  
427 and an apparent drop in population size in quoll-invaded melomys populations. This  
428 numerical effect on melomys density had an impact on seed predation rates, because seed  
429 take is strongly associated with the density of melomys in this system. This is a classic  
430 trophic cascade: predation suppresses herbivore density, which reduces the pressure that  
431 herbivores place on primary producers. Our study, however, also reveals an additional,  
432 subtler, cascade effect; driven by altered prey behaviour rather than by altered prey  
433 density.

434           Within months of quolls appearing on the island, invaded populations of melomys  
435 were significantly shyer than nearby, predator-free populations of conspecifics. This rapid  
436 but generalised response to a novel threat appears to have had a subtle effect on seed  
437 predation rates: when we examine unscented seeds, per capita seed take is slightly lower in  
438 quoll-invaded populations. This generalised response appears to have been supplemented  
439 over time with more threat-specific antipredator behaviours. Although the willingness of  
440 predator-exposed melomys to emerge from shelter (i.e. boldness) converged through time  
441 with that of predator-free melomys, predator-exposed melomys continued to be more  
442 neophobic than their predator-free conspecifics throughout the study. Meanwhile,  
443 predator-scent aversion, as evidenced by seed plots, steadily increased over time.  
444 Presumably the significant and novel predation pressure induced by the introduction of  
445 quolls resulted in selection on behaviour and/or learning in impacted rodent populations,  
446 allowing them to fine-tune their behavioural response (decrease general shyness, but  
447 maintain neophobia, and respond to specific cues) as the nature of the threat became  
448 clearer. These changing behavioural responses imply a generalised reduction in seed take  
449 that also becomes fine-tuned over time, with high risk sites (those that smell of predators)  
450 ultimately displaying substantially lower seed take than low risk sites. Thus, we see a  
451 reduction in seed take that applies to the landscape becoming a fine-grained response,  
452 varying on a spatial scale measured in the tens of metres.

453           Although our study documented dramatic population declines in predator-invaded  
454 melomys populations, and we are assigning the causation of these declines to the  
455 introduction of quolls, we need to address the confounding factors that may affect how we  
456 interpret our results. Firstly, there is an inherent and unavoidable spatial confound in our  
457 study system driven by the location of our study sites. We cannot exclude the possibility

458 that some of the population change we observe in our predator-invaded populations could  
459 also be due to the population naturally declining towards sustainable levels unrelated to the  
460 addition of a novel predator. It is possible that, by chance, when we started monitoring  
461 populations of melomys, populations at northern sites were at a population peak and were  
462 naturally cycling towards sustainable levels, while southern populations were stable.  
463 However, although we cannot rule this out, such between population differences would be  
464 expected to be driven by differences in resource availability between the locations (e.g.  
465 Dickman *et al.* 1999; Russell & Ruffino 2012). We believe this is unlikely in our study system,  
466 given the relatively close proximity of our sites (<10 km) and the spatially homogenous  
467 climatic conditions that govern the wet-dry monsoonal tropics of northern Australia. Rodent  
468 population cycles in the Australian wet-dry tropics appear to be primarily driven by annual  
469 differences in rainfall between wet seasons, rather than spatial differences within years  
470 (Madsen & Shine 1999). For this reason, we suspect natural population cycles are unlikely to  
471 explain the population change differences we observe in this study.

472         Additionally, there is the unplanned, confounding factor of the fire that burnt  
473 through northern Indian Island after completion of our population monitoring in 2017. Such  
474 fires are commonplace in the Australian wet-dry tropics (Russell-Smith & Yates 2007); a  
475 regular disturbance that is often rapidly offset by the annual monsoon driven wet season.  
476 Since our sites are composed of grass-free woodland, the fire that burnt through them  
477 mostly burnt leaf-litter (though it reached the mid-storey in other parts of the island). While  
478 this likely reduced the short-term availability of food and cover for melomys, it is unlikely to  
479 directly explain the demographic effects we observed. A previous study investigating the  
480 effect of fire regimes on native mammals in savanna woodland in Kakadu National Park,  
481 Northern Territory was unable to detect an effect of fire frequency or intensity on the



482 survival or recruitment of grassland melomys, despite finding fire impacts in all other co-  
483 occurring native mammals studied (Griffiths & Brook 2015). Interestingly, even in a system  
484 where fire is much more infrequent and significantly more intense (e.g. mesic habitats of  
485 eastern Australia), grassland melomys were found to be relatively unaffected by a wildfire  
486 that caused significant impacts to a co-occurring native rodent, and any demographic  
487 impacts felt by melomys were entirely absent within months of the fire (Liedloff *et al.* 2018).  
488 Additionally, the most dramatic behavioural difference (boldness and neophobia) between  
489 quoll-invaded and quoll-free sites was observed immediately prior to the occurrence of the  
490 fire (early August vs. mid-August 2017). For the behavioural changes we observed that were  
491 potentially confounded by fire, such as predator-scent aversion, we would expect to see  
492 these effects decreasing with time since fire if fire was driving this response, instead we see  
493 the opposite trend. Finally, if food had become strongly limiting as a consequence of the  
494 fire, we would expect to have observed an increase in seed take in the burned (quoll-  
495 invaded) sites, instead we saw a decrease. For these reasons, we suspect the fire was  
496 unlikely to be directly responsible for the demographic effects to melomys we observed,  
497 and fire cannot in any way explain the response we observed to quoll-scented seeds. We,  
498 therefore, believe our interpretation of these changes as being driven mostly by the  
499 addition of a novel predator to the system is the most parsimonious and globally coherent  
500 interpretation of the data.

501 Predation is a pervasive selective force in most natural systems, driving evolutionary  
502 change in prey morphology, physiology, life history and behaviour. Unlike morphology and  
503 physiology, however, the labile nature of behaviour makes it a particularly powerful trait for  
504 rapid response in a changing world (Réale *et al.* 2007; Sih *et al.* 2010b; Dall & Griffith 2014).  
505 Behavioural comparisons of wild populations exposed to differing predation regimes

506 provides some support for the prediction that reduced boldness would be selected for  
507 under high predation scenarios (Åbjörnsson *et al.* 2004; Bell 2005; Brydges *et al.* 2008) and  
508 that the appearance of novel predators can result in bold individuals becoming shy  
509 (Niemelä *et al.* 2012), however, the opposite pattern of response can also occur (Brown *et*  
510 *al.* 2005; Urban 2007) or behavioural phenotypes can be unrelated to predation regime  
511 (Laurila 2000; Carlson & Langkilde 2014). Interestingly, a number of studies have  
512 demonstrated that individuals from high-predation areas were quicker to emerge (Harris *et*  
513 *al.* 2010) and were bolder and more aggressive (Bell & Sih 2007; Dingemanse *et al.* 2007)  
514 than predator-naïve conspecifics. Although we found the opposite pattern to this  
515 immediately following the arrival of a novel predator, by the second year after predator  
516 introduction we found the boldness of melomys converging with that of predator-free  
517 populations. Thus, it is clear that the behavioural composition of these populations are  
518 dynamic, and it seems likely this dynamism (and perhaps the capacity of the prey species to  
519 identify specific threats) may explain some of the variation between earlier studies.

520         Although boldness may change over time, neophobia, as a generalised adaptive  
521 response to predation pressure, is now well supported across a number of studies (Crane *et*  
522 *al.* 2019). Individuals living under high predation risk scenarios have been shown to typically  
523 display generalized neophobia (Brown *et al.* 2015; Elvidge *et al.* 2016), and neophobia can  
524 increase the survival of predator-naïve individuals in initial encounters with predators  
525 (Ferrari *et al.* 2015; Crane *et al.* 2018). Certainly, in our study, predator-exposed melomys  
526 were significantly more neophobic than their predator-free conspecifics; an effect  
527 maintained throughout the study.

528         Despite reduced survival, significant population declines, and clear behavioural  
529 changes in invaded populations, it is impossible to determine with certainty from our data

530 whether changes in the behaviour of predator-invaded melomys populations are the result  
531 phenotypic plasticity (learning) or natural selection. The low between trapping session  
532 survival of melomys in quoll-invaded populations means few individuals survive between  
533 sessions, so natural selection is a possibility, and selection on these behavioural traits is  
534 potentially very strong. Although behavioural changes in predator-invaded populations  
535 have been documented in a few systems where predator introductions have been staged  
536 and experimentally controlled (Lapiedra *et al.* 2018; Blumstein *et al.* 2019; Cunningham *et*  
537 *al.* 2019; Pringle *et al.* 2019), elucidating whether these observed changes arise because of  
538 behavioural plasticity or natural selection can be exceptionally difficult. Rapid behavioural  
539 responses of vulnerable prey to recovered predators has been observed in a single prey  
540 generation, presumably due to behavioural plasticity (Berger *et al.* 2001; Cunningham *et al.*  
541 2019). Similarly, behavioural adjustments to an introduced predator have been observed as  
542 a result of natural selection on advantageous behavioural traits (Lapiedra *et al.* 2018). In  
543 this study, although we had measures of individual behaviour, our between session  
544 recapture rates of these individuals was sufficiently low that we had no longitudinal data  
545 on the behaviour of individuals to test whether individuals were altering their behaviour or  
546 whether natural selection was resulting in population-level change. It thus remains possible  
547 (and quite likely) that both mechanisms were in play.

548         Although northern quolls represent a novel predator to melomys on Indian Island,  
549 the two species' shared evolutionary history on the northern Australian mainland may  
550 provide some explanation as to why this staged introduction resulted in rapid, finely-tuned  
551 behavioural adjustment in melomys, rather than extinction. Isolation from predators can  
552 rapidly result in the loss of antipredator behaviours from a prey species' behavioural  
553 repertoire (Blumstein & Daniel 2005; Jolly *et al.* 2018a), dramatically increasing an

554 individual's susceptibility to predation following the introduction of either predator or prey  
555 (Carthey & Banks 2014; Jolly *et al.* 2018b). But such outcomes are not inevitable: length of  
556 isolation, co-evolutionary history, degree of predator novelty, density-dependent effects,  
557 population size, and pre-existing predator-prey associations (Berger *et al.* 2001; Blumstein  
558 2006; Banks & Dickman 2007; Sih *et al.* 2010a; Carthey & Banks 2014) are all likely to be  
559 hugely influential in determining whether an invaded population adjusts to the invader or  
560 proceeds towards extinction. Recently, a conservation introduction of Tasmanian devils to  
561 an island previously lacking them found that their possum prey rapidly adjusted their  
562 foraging behaviour to accommodate this newly arrived predator (Cunningham *et al.* 2019).  
563 Despite possums having lived on the island in isolation from devils since the 1950s,  
564 presumably, their long evolutionary history together on mainland Tasmania had them  
565 primed to respond to this predatory archetype (Sih *et al.* 2010a; Carthey & Banks 2014;  
566 Cunningham *et al.* 2019). This shared evolutionary history is likely responsible for both  
567 possums' and melomys' ability to rapidly mount appropriate antipredator responses to the  
568 introduction of these predators. The predators are novel within an individual's lifetime, but  
569 the individual's ancestors have encountered them before.

570         Although our results suggest that invaded melomys populations are beginning to  
571 adjust to the presence of northern quolls as a novel predator on Indian Island, there has  
572 been no sign of demographic recovery from the addition of this predation pressure on the  
573 island. Data from our seed removal experiment clearly demonstrated that the function of  
574 melomys as seed harvesters and dispersers scales with density. Trophic cascades resulting  
575 from the addition and loss of predators from ecosystems has been observed in a number of  
576 systems globally (Ripple *et al.* 2001; Terborgh *et al.* 2001; Estes *et al.* 2011), and the results  
577 can profoundly shape entire systems. As the only rodent and the dominant granivore in this

578 system, while melomys populations may or may not go extinct as a result of quoll invasion,  
579 their reduced abundance and weakened ability to harvest and disperse seeds may have yet  
580 to be observed, longer-term consequences for the vegetation structure and ecosystem  
581 function of Indian Island (McConkey & O’Farrill 2016). Currently, grass is a rare vegetation  
582 feature on Indian island (though it is a dominant feature of savanna woodlands generally),  
583 and this is quite possibly a result of the high density of melomys on this (previously)  
584 predator-free island. The presence of quolls may well change that, as both numerical and  
585 behaviour responses of melomys cascade down to the grass community.

586         Empirical research on the effects of novel predators on recipient communities under  
587 controlled conditions on a landscape-scale is exceptionally difficult and remains relatively  
588 rare. The introduction of threatened predators to landscapes from which they have been  
589 lost (Cunningham *et al.* 2019) or where they are entirely novel (Lapiedra *et al.* 2018),  
590 however, provides a unique opportunity to observe how naïve prey can respond to novel  
591 predators, and the mechanisms by which predators can structure communities. Our study  
592 provides empirical support that some impacted prey populations can adjust rapidly to the  
593 arrival of a novel predator via a generalised behavioural response (decreased boldness)  
594 followed by development of a species-specific antipredator response (behavioural fine-  
595 tuning). The arrival of the novel predator appears to have set off a trophic cascade that was  
596 likely driven, not only by changed prey density, but also by changed prey behaviour. Thus,  
597 rapid adaptive shift may allow prey populations to persist, but large-scale, system-wide  
598 changes may still follow.

599 **Acknowledgments**

600 Thanks to Kenbi Traditional Owners (Raelene and Zoe Singh) for land access permission and  
601 Kenbi Rangers for assistance in the field. Special thanks to Kenbi Rangers Brett Bigfoot, Rex  
602 Edmunds, Jack Gardner, Ian McFarlane, Dale Singh, and Rex Singh for continued field  
603 assistance throughout this project. Thanks to Kenbi Ranger Co-ordinator Steven Brown for  
604 logistical support in the field. Thanks to Alana de Laive for graphic design of figures. Thanks  
605 to Ella Kelly and Naomi Indigo for logistical and moral support on the island. We thank two  
606 anonymous reviewers and Professor Réale for their comments via Peer Community in  
607 Ecology, which greatly improved the manuscript.

608

609 **Funding information**

610 This research was funded by an Australian Research Council Linkage Grant (JKW and BP  
611 LP150100722). Animal ethics approval for this work was provided by the University of  
612 Melbourne (1814518) and Charles Darwin University (A13026) Animal Ethics Committees. In  
613 kind support was provided by Kenbi Rangers and the Northern Territory Government  
614 Department of Environment and Natural Resources, Flora and Fauna  
615 Division (via GRG). CJJ was supported by an Australian Postgraduate Award and the  
616 Holsworth Wildlife Research Endowment.

617

618 **Data availability**

619 The datasets generated and analysed during this study are available via figshare.com.

620 <https://doi.org/10.26188/5dd8fe5651e8b> is currently embargoed but access can be granted  
621 on request.

622 **REFERENCES**

- 623 Åbjörnsson, K., Hansson, L.-A. & Brönmark, C. (2004). Responses of prey from habitats with  
624 different predator regimes: local, adaptation and heritability. *Ecology*, 85, 1859–  
625 1866.
- 626 Abrams, P.A. (2000). The evolution of predator-prey interactions: theory and evidence.  
627 *Annu. Rev. Ecol. Syst.*, 31, 79–105.
- 628 Andersen, A.N., Cook, G.D., Corbett, L.K., Douglas, M.M., Eager, R.W., Russell-Smith, J., *et al.*  
629 (2005). Fire frequency and biodiversity conservation in Australian tropical savannas:  
630 implications from the Kapalga fire experiment. *Austral Ecol.*, 30, 155–167.
- 631 Banks, P.B. & Dickman, C.R. (2007). Alien predation and the effects of multiple levels of prey  
632 naiveté. *Trends Ecol. Evol.*, 22, 229–230.
- 633 Begg, R., Walsh, B., Woerle, F. & King, S. (1983). Ecology of *Melomys burtoni*, the grassland  
634 melomys (Rodentia: Muridae) at Cobourg Peninsula, N.T. *Wildl. Res.*, 10, 259–267.
- 635 Bell, A.M. (2005). Behavioural differences between individuals and two populations of  
636 stickleback (*Gasterosteus aculeatus*): behavioural syndromes. *J. Evol. Biol.*, 18, 464–  
637 473.
- 638 Bell, A.M. & Sih, A. (2007). Exposure to predation generates personality in threespined  
639 sticklebacks (*Gasterosteus aculeatus*). *Ecol. Lett.*, 10, 828–834.
- 640 Berger, J., Swenson, J.E. & Persson, I.-L. (2001). Recolonizing carnivores and naive prey:  
641 conservation lessons from pleistocene extinctions. *Science*, 291, 1036–1039.
- 642 Blumstein, D.T. (2006). The multipredator hypothesis and the evolutionary persistence of  
643 antipredator behavior. *Ethology*, 112, 209–217.
- 644 Blumstein, D.T. & Daniel, J.C. (2005). The loss of anti-predator behaviour following isolation  
645 on islands. *Proc. R. Soc. B*, 272, 1663–1668.

- 646 Blumstein, D.T., Letnic, M. & Moseby, K.E. (2019). *In situ* predator conditioning of naive prey  
647 prior to reintroduction. *Phil. Trans. R. Soc. B*, 374, 20180058.
- 648 Braithwaite, R. & Griffiths, A. (1994). Demographic variation and range contraction in the  
649 northern quoll, *Dasyurus hallucatus* (Marsupialia: Dasyuridae). *Wildl. Res.*, 21, 203–  
650 217.
- 651 Brown, C. & Braithwaite, V.A. (2004). Size matters: a test of boldness in eight populations of  
652 the poeciliid *Brachyraphis episcopi*. *Anim. Behav.*, 68, 1325–1329.
- 653 Brown, C., Jones, F. & Braithwaite, V. (2005). *In situ* examination of boldness–shyness traits  
654 in the tropical poeciliid, *Brachyraphis episcopi*. *Anim. Behav.*, 70, 1003–1009.
- 655 Brown, G.E., Elvidge, C.K., Ramnarine, I., Ferrari, M.C.O. & Chivers, D.P. (2015). Background  
656 risk and recent experience influences retention of neophobic responses to  
657 predators. *Behav. Ecol. Sociobiol.*, 69, 737–745.
- 658 Brown, G.E., Ferrari, M.C.O., Elvidge, C.K., Ramnarine, I. & Chivers, D.P. (2013).  
659 Phenotypically plastic neophobia: a response to variable predation risk. *Proc. R. Soc.*  
660 *B*, 280, 20122712.
- 661 Brydges, N.M., Colegrave, N., Heathcote, R.J.P. & Braithwaite, V.A. (2008). Habitat stability  
662 and predation pressure affect temperament behaviours in populations of three-  
663 spined sticklebacks. *J. Anim. Ecol.*, 77, 229–235.
- 664 Buckland, S.T., Burnham, K.P. & Augustin, N.H. (1997). Model selection: an integral part of  
665 inference. *Biometrics*, 53, 603–618.
- 666 Burnham, K.P. & Anderson, D.R. (1998). *Model selection and inference: a practical*  
667 *information-theoretic approach*. Springer, New York.
- 668 Carlson, B.E. & Langkilde, T. (2014). No evidence of selection by predators on tadpole  
669 boldness. *Behaviour*, 151, 23–45.



- 670 Carter, A.J., Feeney, W.E., Marshall, H.H., Cowlshaw, G. & Heinsohn, R. (2013). Animal  
671 personality: what are behavioural ecologists measuring? *Biol. Rev.*, 88, 465–475.
- 672 Carthey, A.J.R. & Banks, P.B. (2014). Naïveté in novel ecological interactions: lessons from  
673 theory and experimental evidence. *Biol. Rev.*, 89, 932–949.
- 674 Courchamp, F., Chapuis, J.-L. & Pascal, M. (2003). Mammal invaders on islands: impact,  
675 control and control impact. *Biol. Rev.*, 78, 347–383.
- 676 Crane, A.L., Brown, G.E., Chivers, D.P. & Ferrari, M.C.O. (2019). An ecological framework of  
677 neophobia: from cells to organisms to populations. *Biol. Rev.*, 218–231.
- 678 Crane, A.L., Chivers, D.P. & Ferrari, M.C.O. (2018). Embryonic background risk promotes the  
679 survival of tadpoles facing surface predators. *PLoS ONE*, 13, e0193939.
- 680 Cremona, T., Mella, V.S.A., Webb, J.K. & Crowther, M.S. (2015). Do individual differences in  
681 behavior influence wild rodents more than predation risk? *J. Mammal.*, 96, 1337–  
682 1343.
- 683 Cunningham, C.X., Johnson, C.N., Hollings, T., Kreger, K. & Jones, M.E. (2019). Trophic  
684 rewilding establishes a landscape of fear: Tasmanian devil introduction increases  
685 risk-sensitive foraging in a key prey species. *Ecography*, 42, 2053–2059.
- 686 Dall, S.R.X. & Griffith, S.C. (2014). An empiricist guide to animal personality variation in  
687 ecology and evolution. *Front. Ecol. Evol.*, 2, 1–7.
- 688 Dickman, C.R., Mahon, P.S., Masters, P. & Gibson, D.F. (1999). Long-term dynamics of  
689 rodent populations in arid Australia: the influence of rainfall. *Wildl. Res.*, 26, 389–  
690 403.
- 691 Dielenberg, R.A. & McGregor, I.S. (2001). Defensive behavior in rats towards predatory  
692 odors: a review. *Neurosci. Biobehav. Rev.*, 25, 597–609.

- 693 Dingemanse, N.J., Wright, J., Kazem, A.J.N., Thomas, D.K., Hickling, R. & Dawnay, N. (2007).  
694 Behavioural syndromes differ predictably between 12 populations of three-spined  
695 stickleback. *J. Anim. Ecol.*, 76, 1128–1138.
- 696 Doherty, T.S., Glen, A.S., Nimmo, D.G., Ritchie, E.G. & Dickman, C.R. (2016). Invasive  
697 predators and global biodiversity loss. *Proc. Natl. Acad. Sci. USA*, 113, 11261–11265.
- 698 Elvidge, C.K., Chuard, P.J.C. & Brown, G.E. (2016). Local predation risk shapes spatial and  
699 foraging neophobia patterns in Trinidadian guppies. *Curr. Zool.*, 62, 457–462.
- 700 Estes, J.A., Terborgh, J., Brashares, J.S., Power, M.E., Berger, J., Bond, W.J., *et al.* (2011).  
701 Trophic downgrading of planet Earth. *Science*, 333, 301–306.
- 702 Ferrari, M.C.O., McCormick, M.I., Meekan, M.G. & Chivers, D.P. (2015). Background level of  
703 risk and the survival of predator-naive prey: can neophobia compensate for predator  
704 naivety in juvenile coral reef fishes? *Proc. R. Soc. B*, 282, 20142197.
- 705 Fortin, D., Beyer, H.L., Boyce, M.S., Smith, D.W., Duchesne, T. & Mao, J.S. (2005). Wolves  
706 influence elk movements: behavior shapes a trophic cascade in Yellowstone National  
707 Park. *Ecology*, 86, 1320–1330.
- 708 Gelman, A. & Rubin, D.B. (1992a). Inference from iterative simulation using multiple  
709 sequences. *Stat. Sci.*, 7, 457–472.
- 710 Gelman, A. & Rubin, D.B. (1992b). [Practical Markov Chain Monte Carlo]: Rejoinder:  
711 replication without contrition. *Stat. Sci.*, 7, 503–511.
- 712 Griffiths, A.D. & Brook, B.W. (2015). Fire impacts recruitment more than survival of small-  
713 mammals in a tropical savanna. *Ecosphere*, 6, 1–22.
- 714 Harris, S., Ramnarine, I.W., Smith, H.G. & Pettersson, L.B. (2010). Picking personalities apart:  
715 estimating the influence of predation, sex and body size on boldness in the guppy  
716 *Poecilia reticulata*. *Oikos*, 119, 1711–1718.

- 717 Jolly, C.J., Kelly, E., Gillespie, G.R., Phillips, B. & Webb, J.K. (2018b). Out of the frying pan:  
718 Reintroduction of toad-smart northern quolls to southern Kakadu National Park.  
719 *Austral Ecol.*, 43, 139–149.
- 720 Jolly, C.J., Webb, J.K., Gillespie, G.R., Hughes, N.K. & Phillips, B.L. (2019). Bias averted:  
721 personality may not influence trappability. *Behav. Ecol. Sociobiol.*, 73, 129.
- 722 Jolly, C.J., Webb, J.K. & Phillips, B.L. (2018a). The perils of paradise: an endangered species  
723 conserved on an island loses antipredator behaviours within 13 generations. *Biol.*  
724 *Lett.*, 14, 20180222.
- 725 Kelly, E. (2019). *Targeted gene flow for conservation: northern quolls and the invasive cane*  
726 *toad*. PhD Thesis. University of Melbourne, Australia.
- 727 Kelly, E. & Phillips, B.L. (2016). Targeted gene flow for conservation. *Conserv. Biol.*, 30, 259–  
728 267.
- 729 Kemper, C.M., Kitchener, D.J., Humphreys, W.F., How, R.A., Bradley, A.J. & Schmitt, L.H.  
730 (1987). The demography and physiology of *Melomys* sp. (Rodentia: Muridae) in the  
731 Mitchell Plateau area, Kimberley, Western Australia. *J. Zool.*, 212, 533–562.
- 732 Kery, M. & Schaub, M. (2011). *Bayesian Population Analysis using WinBUGS: A Hierarchical*  
733 *Perspective*. Elsevier Science & Technology, San Diego, United States.
- 734 Lapiedra, O., Schoener, T.W., Leal, M., Losos, J.B. & Kolbe, J.J. (2018). Predator-driven  
735 natural selection on risk-taking behavior in anole lizards. *Science*, 360, 1017–1020.
- 736 Laundre, J.W., Hernandez, L. & Ripple, W.J. (2010). The landscape of fear: ecological  
737 implications of being afraid. *TOECOLJ*, 3, 1–7.
- 738 Laurila, A. (2000). Behavioural responses to predator chemical cues and local variation in  
739 antipredator performance in *Rana temporaria* tadpoles. *Oikos*, 88, 159–168.

- 740 Liedloff, A.C., Wilson, J.C. & Engeman, R.M. (2018). The effect of wildfire on population  
741 dynamics for two native small mammal species in a coastal heathland in Queensland,  
742 Australia. *Acta Oecol.*, 88, 58–64.
- 743 Lima, S.L. & Dill, L.M. (1990). Behavioral decisions made under the risk of predation: a  
744 review and prospectus. *Can. J. Zool.*, 68, 619–640.
- 745 López, P., Hawlena, D., Polo, V., Amo, L. & Martín, J. (2005). Sources of individual shy–bold  
746 variations in antipredator behaviour of male Iberian rock lizards. *Anim. Behav.*, 69,  
747 1–9.
- 748 Madsen, T. & Shine, R. (1999). Rainfall and rats: Climatically-driven dynamics of a tropical  
749 rodent population. *Austral Ecol.*, 24, 80–89.
- 750 McConkey, K.R. & O’Farrill, G. (2016). Loss of seed dispersal before the loss of seed  
751 dispersers. *Biol. Conserv.*, 201, 38–49.
- 752 McGregor, I.S., Schrama, L., Ambermoon, P. & Dielenberg, R.A. (2002). Not all ‘predator  
753 odours’ are equal: cat odour but not 2,4,5 trimethylthiazoline (TMT; fox odour)  
754 elicits specific defensive behaviours in rats. *Behav. Brain Res.*, 129, 1–16.
- 755 Medina, F.M., Bonnaud, E., Vidal, E., Tershy, B.R., Zavaleta, E.S., Josh Donlan, C., *et al.*  
756 (2011). A global review of the impacts of invasive cats on island endangered  
757 vertebrates. *Glob. Change Biol.*, 17, 3503–3510.
- 758 Moore, H.A., Dunlop, J.A., Valentine, L.E., Woinarski, J.C.Z., Ritchie, E.G., Watson, D.M., *et al.*  
759 (2019). Topographic ruggedness and rainfall mediate geographic range contraction  
760 of a threatened marsupial predator. *Divers. Distrib.*, 25, 1818–1831.
- 761 Niemelä, P.T., DiRienzo, N. & Hedrick, A.V. (2012). Predator-induced changes in the boldness  
762 of naïve field crickets, *Gryllus integer*, depends on behavioural type. *Anim. Behav.*,  
763 84, 129–135.

- 764 Oakwood, M. (1997). *The ecology of the northern quoll*, *Dasyurus hallucatus*. PhD Thesis.  
765 Australian National University, Australia.
- 766 Oakwood, M., Woinarski, J.C.Z. & Burnett, S. (2016). *Dasyurus hallucatus* (northern quoll).  
767 The IUCN Red List of Threatened Species 2016:  
768 e.T6295A21947321. [http://dx.doi.org/10.2305/IUCN.UK.2016-](http://dx.doi.org/10.2305/IUCN.UK.2016-2.RLTS.T6295A21947321.en)  
769 [2.RLTS.T6295A21947321.en](http://dx.doi.org/10.2305/IUCN.UK.2016-2.RLTS.T6295A21947321.en). Downloaded on 31 October 2019.
- 770 Plummer, M., Stukalov, A. & Denwood, M. (2017). rjags: Bayesian graphical models using  
771 MCMC. URL <http://CRAN.R-project.org/package=rjags>. R package version, 2, 0–4.
- 772 Pringle, R.M., Kartzinel, T.R., Palmer, T.M., Thurman, T.J., Fox-Dobbs, K., Xu, C.C.Y., *et al.*  
773 (2019). Predator-induced collapse of niche structure and species coexistence.  
774 *Nature*, 570, 58–64.
- 775 R Core Team. (2019). *R: A Language and Environment for Statistical Computing*. R  
776 Foundation for Statistical Computing, Vienna.
- 777 Réale, D., Reader, S.M., Sol, D., McDougall, P.T. & Dingemanse, N.J. (2007). Integrating  
778 animal temperament within ecology and evolution. *Biol. Rev.*, 82, 291–318.
- 779 Relyea, R.A. (2003). Predators come and predators go: the reversibility of predator-induced  
780 traits. *Ecology*, 84, 1840–1848.
- 781 Ripple, W.J., Larsen, E.J., Renkin, R.A. & Smith, D.W. (2001). Trophic cascades among wolves,  
782 elk and aspen on Yellowstone National Park’s northern range. *Biol. Conserv.*, 102,  
783 227–234.
- 784 Royle, J.A., Dorazio, R.M. & Link, W.A. (2007). Analysis of multinomial models with unknown  
785 index using data augmentation. *J. Comput. Graph. Stat.*, 16, 67–85.
- 786 Russell, J.C. & Ruffino, L. (2012). The influence of spatio-temporal resource fluctuations on  
787 insular rat population dynamics. *Proc. R. Soc. B*, 279, 767–774.

- 788 Russell-Smith, J. & Yates, C.P. (2007). Australian savanna fire regimes: context, scales,  
789 patchiness. *Fire Ecol.*, 3, 48–63.
- 790 Sax, D., Stachowicz, J., Brown, J., Bruno, J., Dawson, M., Gaines, S., *et al.* (2007). Ecological  
791 and evolutionary insights from species invasions. *Trends Ecol. Evol.*, 22, 465–471.
- 792 Schoener, T.W. & Spiller, D.A. (1996). Devastation of prey diversity by experimentally  
793 introduced predators in the field. *Nature*, 381, 691–694.
- 794 Shine, R. (2010). The ecological impact of invasive cane toads (*Bufo marinus*) in Australia. *Q.*  
795 *Rev. Biol.*, 85, 253–291.
- 796 Sih, A. (1992). Prey uncertainty and the balancing of antipredator and feeding needs. *Am.*  
797 *Nat.*, 139, 1052–1069.
- 798 Sih, A., Bolnick, D.I., Luttbeg, B., Orrock, J.L., Peacor, S.D., Pintor, L.M., *et al.* (2010a).  
799 Predator-prey naïveté, antipredator behavior, and the ecology of predator invasions.  
800 *Oikos*, 119, 610–621.
- 801 Sih, A., Stamps, J., Yang, L.H., McElreath, R. & Ramenofsky, M. (2010b). Behavior as a key  
802 component of integrative biology in a human-altered world. *Integr. Comp. Biol.*, 50,  
803 934–944.
- 804 Sih, A., Ziemba, R. & Harding, K.C. (2000). New insights on how temporal variation in  
805 predation risk shapes prey behavior. *Trends Ecol. Evol.*, 15, 3–4.
- 806 Simberloff, D., Martin, J.-L., Genovesi, P., Maris, V., Wardle, D.A., Aronson, J., *et al.* (2013).  
807 Impacts of biological invasions: what’s what and the way forward. *Trends Ecol. Evol.*,  
808 28, 58–66.
- 809 Suraci, J.P., Clinchy, M., Dill, L.M., Roberts, D. & Zarette, L.Y. (2016). Fear of large carnivores  
810 causes a trophic cascade. *Nature Comm.*, 7, 10698.

- 811 Tanner, M.A. & Wong, W.H. (1987). The calculation of posterior distributions by data  
812 augmentation. *J. Am. Stat. Assoc.*, 82, 528–540.
- 813 Terborgh, J., Lopez, L., Nunez, P., Rao, M., Shahabuddin, G., Orihuela, G., *et al.* (2001).  
814 Ecological meltdown in predator-free forest fragments. *Science*, 294, 1923–1926.
- 815 Urban, M.C. (2007). Risky prey behavior evolves in risky habitats. *Proc. Natl. Acad. Sci. USA*,  
816 104, 14377–14382.
- 817 Woinarski, J.C.Z., Burbidge, A.A. & Harrison, P.L. (2015). Ongoing unraveling of a continental  
818 fauna: decline and extinction of Australian mammals since European settlement.  
819 *Proc. Natl. Acad. Sci. USA*, 112, 4531–4540.
- 820
